# Supplementary material
Source: publisher site journal article supplement (https://www.dovepress.com/article/263754)
Supplement: Supplementary file 1 [file get_supplementary_file.php]

**Supplementary Table 1** Description of body-related injuries from WBCT results in our cohort (n=186)

| **Injury** | **Negative, n (%)** | **Positive, n (%)** |
| --- | --- | --- |
| **Head related injury** | | |
| **· Subarachnoid Hemorrhage** | 168 (90.3%) | 18 (9.7%) |
| **·   Epidural Hemorrhage** | 180 (96.8%) | 6 (3.2%) |
| **·   Subdural Hemorrhage** | 163 (87.6%) | 23 (12.4%) |
| **·   Midline shift** | 179 (96.2%) | 7 (3.8%) |
| **·   Herniation** | 179 (96.2%) | 7 (3.8%) |
| **·   Skull fracture** | 140 (75.3%) | 46 (24.7%) |
| **·   Intracerebral hemorrhage** | 155 (83.3%) | 31 (16.7%) |
| **·   Pneumocephalus** | 183 (98.4%) | 3 (1.6%) |
| **·   Surgical emphysema of Head & neck** | 179 (96.2%) | 7 (3.8%) |
| **·   Orbital hematoma** | 180 (96.8%) | 6 (3.2%) |
| **Spinal related injury** | | |
| **·   Vertebral body fracture** | 153 (82.3%) | 33 (17.7%) |
| **·   Vertebral Pedicle fracture** | 150 (80.6%) | 36 (19.4%) |
| **·    Vertebral Subluxation** | 185 (99.5%) | 1 (0.5%) |
| **·   Compression Spinal Cord** | 184 (98.9%) | 2 (1.1%) |
| **·   Hematoma of the spinal cord** | 183 (98.4%) | 3 (1.6%) |
| **Chest Related injury** | | |
| **·   Bilateral hemothorax** | 151 (81.2%) | 35 (18.8%) |
| **·   Bilateral pneumothorax*** | 134 (72.8%) | 50 (27.2%) |
| **·   Bilateral Lung Contusion** | 119 (64%) | 67 (36.0%) |
| **·   Bilateral Lung Laceration** | 177 (95.2%) | 9 (4.8%) |
| **·   CT Subcutaneous Emphysema** | 157 (84.4%) | 29 (15.6%) |
| **·   Mediastinal Widening** | 175 (94.1%) | 11 (5.9%) |
| **·   Aortic Dissection** | 179 (96.2%) | 7 (3.8%) |
| **·   Sternal Fracture** | 178 (95.7%) | 8 (4.3%) |
| **·   Tracheal Deviation** | 185 (99.5%) | 1 (0.5%) |
| **·    Esophageal injury** | 185 (99.5%) | 1 (0.5%) |
| **·   Fracture Clavicle** | 169 (90.9%) | 17 (9.1%) |
| **·   Scapular fracture** | 174 (93.5%) | 12 (6.5%) |
| **·   Rib Fracture (single rib)** | 170 (91%) | 16 (9%) |
| **·   Rib Fracture (multiple ribs)** | 157 (84.4%) | 29 (15.6%) |
| **Abdominal related injury** | | |
| **·   Abdominal wall** | 181 (97.3%) | 5 (2.7%) |
| **·   Spleen Injury*** | 162 (88%) | 22 (12%) |
| **·   Liver Injury*** | 158 (85.9%) | 26 (14.1%) |
| **·   Pancreas Injury*** | 183 (98.9%) | 2 (1.1%) |
| **·   Retroperitoneal hematoma*** | 177 (95.7%) | 8 (4.3%) |
| **·   Kidney Injury*** | 174 (94.1%) | 11 (5.9%) |
| **·   Free fluid peritoneum** | 158 (84.9%) | 28 (15.1%) |
| **·   Diaphragmatic injury** | 185 (99.5%) | 1 (0.5%) |
| **·   Pneumoperitoneum** | 177 (95.2%) | 9 (4.8%) |
| **·   Surgical emphysema Abdomen** | 184 (98.9%) | 2 (1.1%) |
| **Pelvis related injury** | | |
| **·   Pelvic fracture** | 178 (95.7%) | 8 (4.3%) |
| **·   Open book fracture** | 184 (98.9%) | 2 (1.1%) |
| **·   Open Fracture** | 186 (100%) | 0 |
| **·   Simple Fracture** | 179 (96.2%) | 7 (3.8%) |
| **·   Sacroiliac Joint Dislocation** | 183 (98.4%) | 3 (1.6%) |
| **·   Urinary Bladder** | 185 (99.5%) | 1 (0.5%) |
| **·   Urethral Injury** | 186 (100%) | 0 |
| **·   Pelvic Vascular Injury** | 185 (99.5%) | 1 (0.5%) |
| **·   Pelvic Hematoma** | 184 (98.9%) | 2 (1.1%) |

* The missing data were excluded.
